# Supplementary material
Source: PubMed Central journal article supplement (PMC4207393)

SUPPLEMENTARY DATA

**Supplementary Figure 1.** Graph shows 21 type 1 diabetes subjects ranked according to the mean number of CD20+ immune cells per islet section. There is an inflection point between subjects #9 and #10, the mid-point of which is marked using the horizontal dotted line (value 3.7 cells/islet section). Subjects above this line are considered CD20Hi and subjects below it are considered CD20Lo.

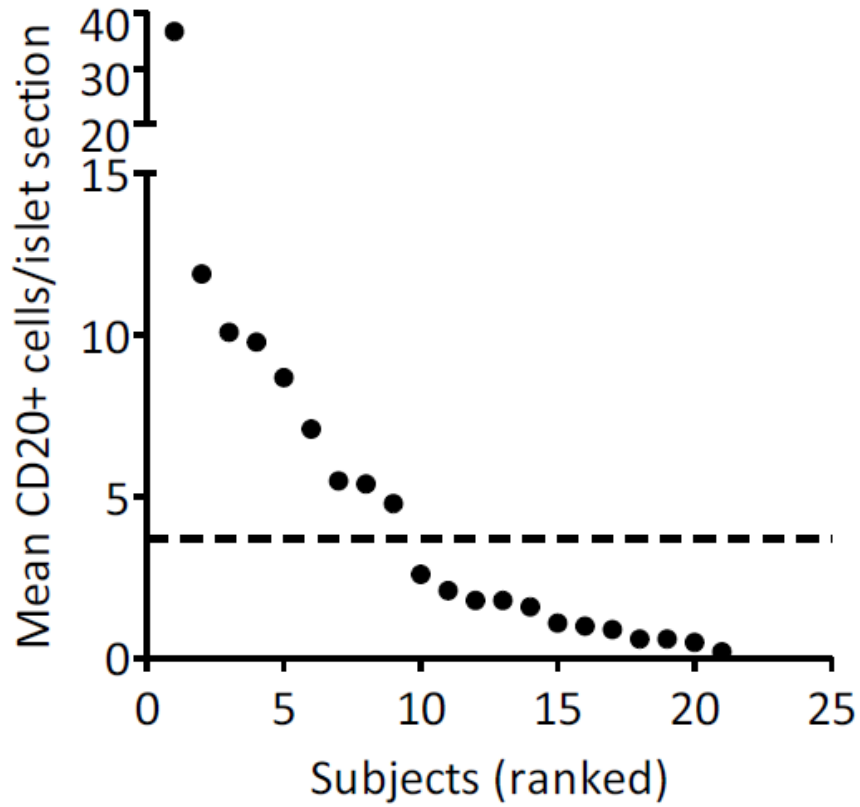

Supplement: supp_db14-0365_DB140365SupplementaryData.pdf [file supp_db14-0365_DB140365SupplementaryData.pdf]
